# Supplementary figures and images for: Characteristics of Websites Presenting Parenteral Supplementation Services in Five European Countries: A Cross-Sectional Study
Source: MDPI journal article supplement (doi:10.3390/nu12123614), 2020-11-25

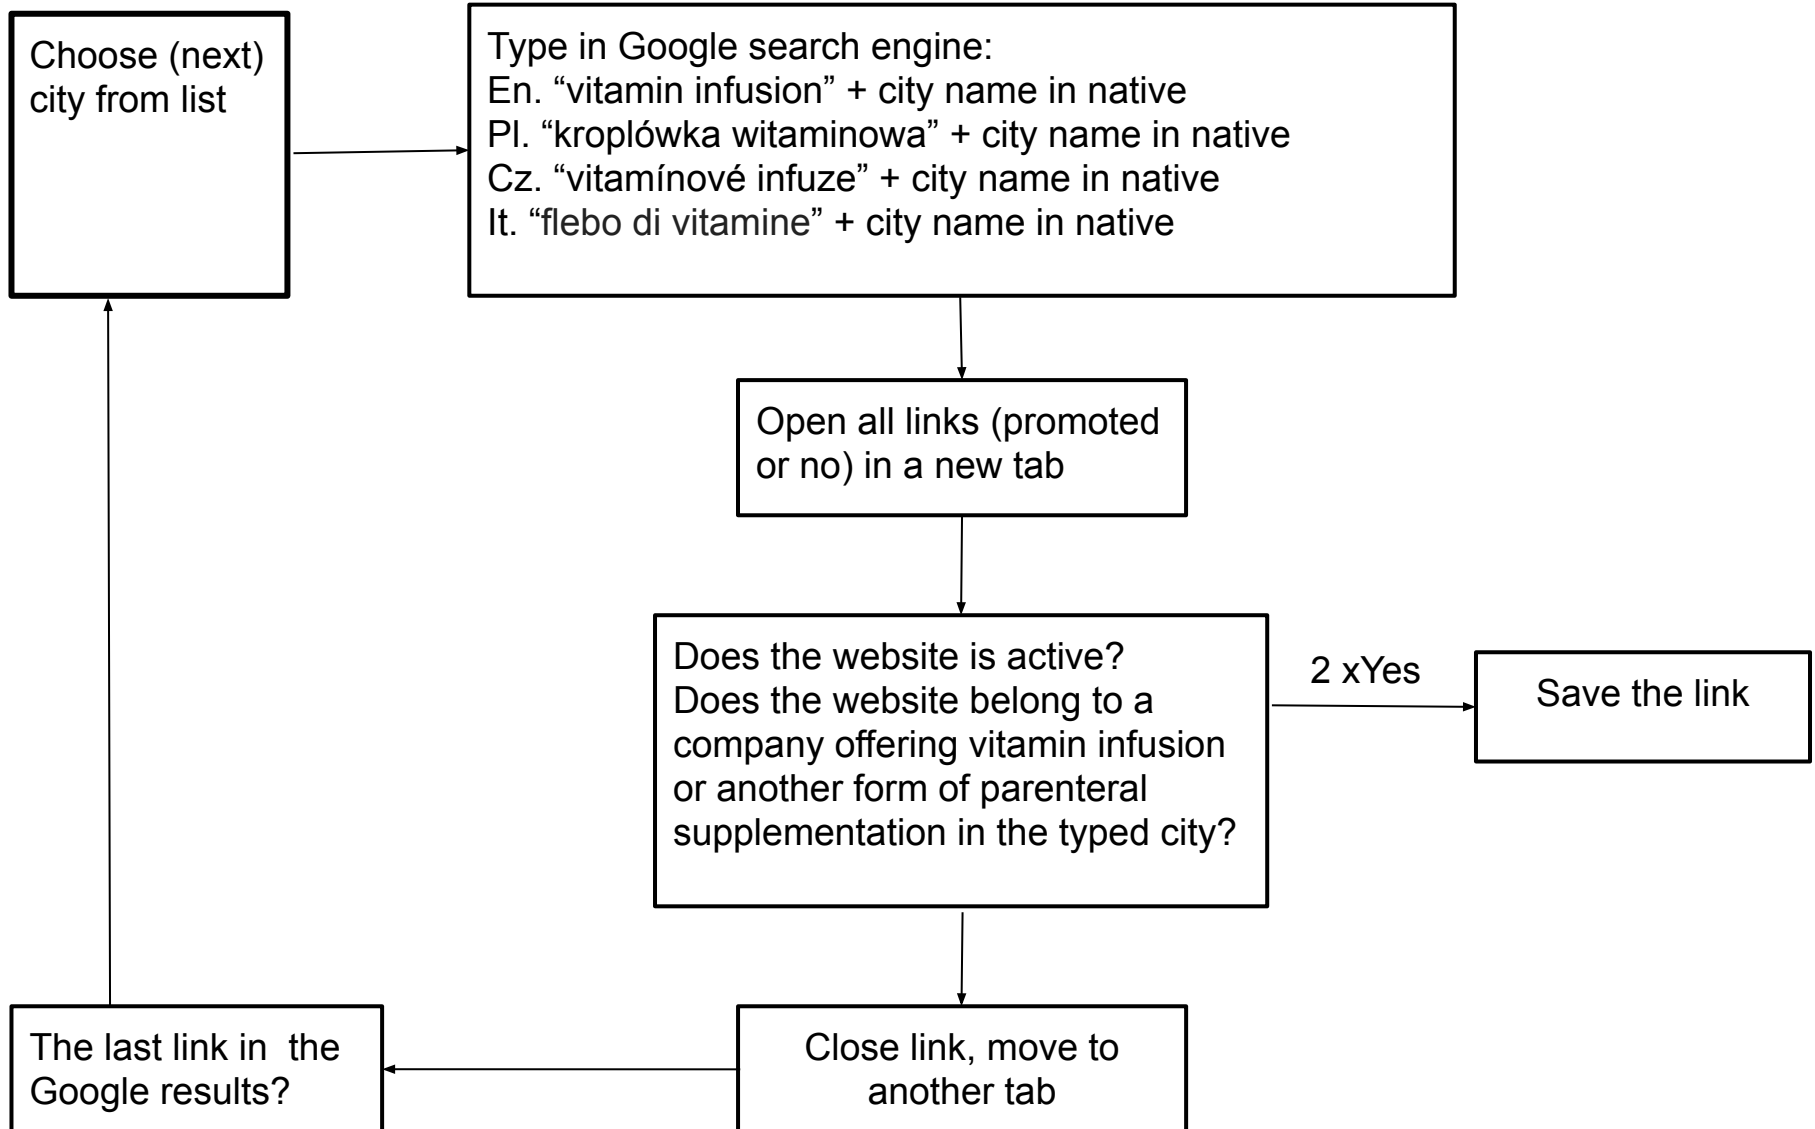

Supplement: s1 [file s1]
